# Supplementary material for: NoLogo: a new statistical model highlights the diversity and suggests new classes of Crm1-dependent nuclear export signals
Source: Springer Nature journal article supplement (doi:10.1186/s12859-018-2076-7), 2018-02-27
Supplement: 12859_2018_2076_MOESM2_ESM.pdf [file 12859_2018_2076_MOESM2_ESM.pdf]

|                      | $\Phi_1$ | Spacer 1 |   |   | $\Phi_2$ | Spacer 2 |   |   | $\Phi_3$ | Spacer 3 |   |   | $\Phi_4$ | Spacer Configuration |   |   |
|----------------------|----------|----------|---|---|----------|----------|---|---|----------|----------|---|---|----------|----------------------|---|---|
| YLR131C_ACE2NES_136  | L        | S        |   |   | I        | S        | S |   | L        | Q        | Q | S | I        | 1                    | 2 | 3 |
| YFL039C_ACT1NES_171  | L        | P        | H | A | I        | L        | R |   | I        | D        |   |   | L        | 3                    | 2 | 1 |
| YFL039C_ACT1NES_212  | I        | K        | E | K | L        | C        | Y |   | V        | A        |   |   | L        | 3                    | 2 | 1 |
| YGL071W_AFT1NES_100  | I        | H        |   |   | L        | D        | P |   | V        | P        | N |   | F        | 1                    | 2 | 2 |
| YPR093C_ASR1NES_103  | L        | S        | E | R | L        | R        | G | T | L        | V        |   |   | M        | 3                    | 3 | 1 |
| YPR093C_ASR1NES_125  | G        | D        | T | D | V        | S        | R |   | L        | S        |   |   | L        | 3                    | 2 | 1 |
| YLR074C_BUD20NES_18  | L        | D        | L |   | I        | Y        | N | D | L        | S        | T | K | E        | 2                    | 3 | 3 |
| YPR119W_CLB2NES_297  | L        | V        | Q |   | L        | D        | K |   | L        | Q        |   |   | L        | 2                    | 2 | 1 |
| YMR232W_FUS2NES_91   | F        | Q        | N |   | V        | V        | R |   | L        | N        |   |   | L        | 2                    | 2 | 1 |
| YDL207W_GLE1NES_351  | L        | P        |   |   | L        | G        | K |   | L        | T        |   |   | L        | 1                    | 2 | 1 |
| YER040W_GLN3NES_64   | L        | E        | A |   | L        | P        | D | D | L        | Y        |   |   | F        | 2                    | 3 | 1 |
| YPL015C_HST2NES_308  | I        | V        | H | D | L        | E        | N |   | L        | S        |   |   | L        | 3                    | 2 | 1 |
| YGL253W_HXK2NES_310  | L        | G        | E |   | I        | L        | R |   | L        | A        |   |   | L        | 2                    | 2 | 1 |
| YGL253W_HXK2NES_23   | L        | M        | Q | Q | I        | E        | N |   | F        | E        | K |   | I        | 3                    | 2 | 2 |
| YLR347C_KAP95NES_55  | L        | E        | G | R | I        | L        | A | A | L        | T        |   |   | L        | 3                    | 3 | 1 |
| YDR499W_LCD1NES_667  | V        | D        | S |   | L        | H        | D |   | L        | T        |   |   | I        | 2                    | 2 | 1 |
| YKL143W_LTV1NES_451  | L        | E        | K |   | V        | T        | N | T | L        | S        | S |   | L        | 2                    | 3 | 2 |
| YEL032W_MCM3NES_834  | L        | Q        | R | R | L        | Q        |   |   | L        | G        |   |   | L        | 3                    | 1 | 1 |
| YOL111C_MDY2NES_117  | I        | K        |   |   | L        | L        |   |   | L        | K        | G | K | V        | 1                    | 1 | 3 |
| YKR048C_NAP1NES_88   | L        | P        | K | N | V        | K        | E | K | L        | L        | S |   | L        | 3                    | 3 | 2 |
| YHR170W_NMD3NES_491  | I        | N        |   |   | I        | D        | E |   | L        | L        | D | E | L        | 1                    | 2 | 3 |
| YER165W_PAB1NES_9    | A        | E        | Q |   | L        | E        | N |   | L        | N        |   |   | I        | 2                    | 2 | 1 |
| YIR006C_PAN1NES_1147 | L        | Q        | E | E | L        | K        | R |   | L        | K        |   |   | L        | 3                    | 2 | 1 |
| YJL128C_PBS2NES_1    | M        | E        | D | K | F        | A        | N |   | L        | S        |   |   | L        | 3                    | 2 | 1 |
| YBL105C_PKC1NES_54   | L        | E        | D | S | L        | K        | K |   | L        | R        |   |   | L        | 3                    | 2 | 1 |
| YKL012W_PRP40NES_274 | L        | K        | E |   | L        | R        | E | Y | L        | N        | G |   | I        | 2                    | 3 | 2 |
| YKL012W_PRP40NES_340 | L        | Q        | N | K | L        | N        | E |   | L        | R        |   |   | L        | 3                    | 2 | 1 |
| YMR235C_RNA1NES_320  | L        | P        | E |   | L        | E        | K |   | L        | E        |   |   | I        | 2                    | 2 | 1 |
| YMR235C_RNA1NES_343  | L        | Q        | S | K | F        | D        | D |   | L        | E        |   |   | V        | 3                    | 2 | 1 |
| YER125W_RSP5NES_687  | L        | I        | G | G | I        | A        | E |   | I        | D        |   |   | I        | 3                    | 2 | 1 |
| YOR329C_SCD5NES_851  | L        | G        | N |   | L        | Q        | S |   | L        | Q        | Q | Q | V        | 2                    | 2 | 3 |
| YAL047C_SPC72NES_418 | L        | E        | K | Q | I        | N        | D |   | L        | Q        |   |   | I        | 3                    | 2 | 1 |
| YDL229W_SSB1NES_578  | L        | S        | D | A | L        | A        | A |   | L        | Q        |   |   | I        | 3                    | 2 | 1 |
| YJL187C_SWE1NES_67   | L        | N        |   |   | L        | S        |   |   | L        | S        | N | T | A        | 1                    | 1 | 3 |
| YML007W_YAP1NES_614  | I        | D        |   |   | V        | D        | G |   | L        | C        | S | E | L        | 1                    | 2 | 3 |
