# Supplementary material for: NoLogo: a new statistical model highlights the diversity and suggests new classes of Crm1-dependent nuclear export signals
Source: Springer Nature journal article supplement (doi:10.1186/s12859-018-2076-7), 2018-02-27
Supplement: 12859_2018_2076_MOESM8_ESM.pdf [file 12859_2018_2076_MOESM8_ESM.pdf]

# NESs

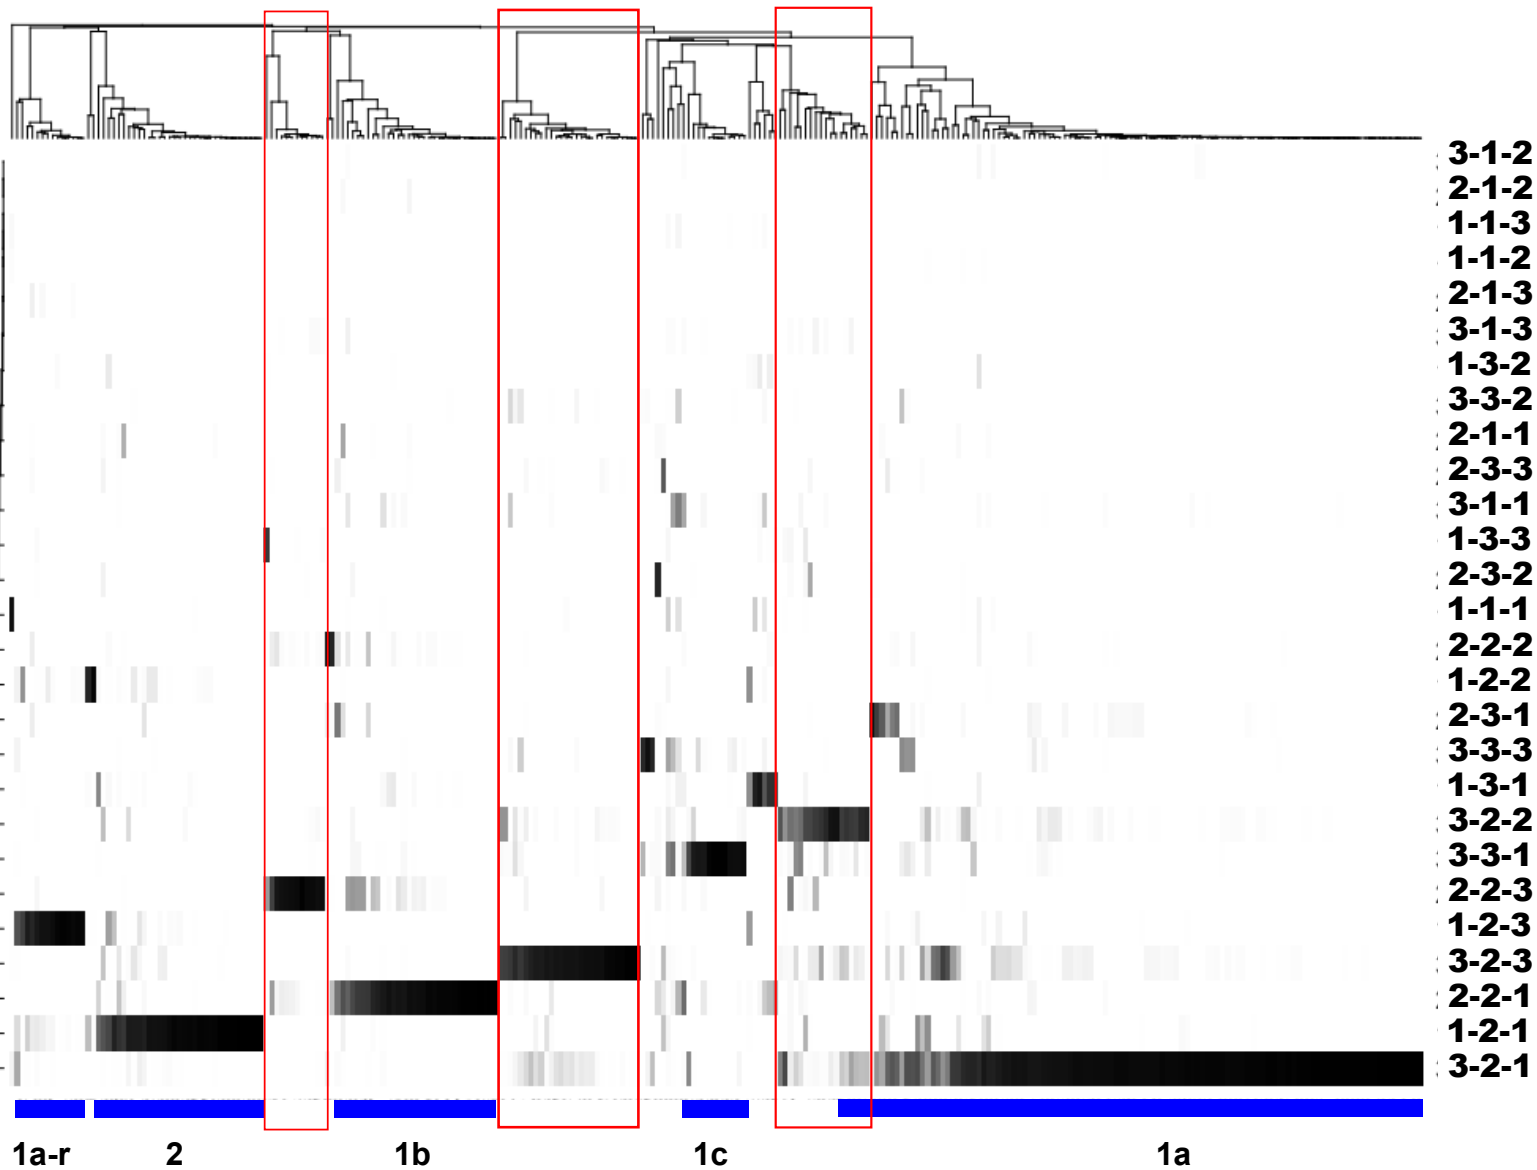

Spacer Configurations

3-1-2  
2-1-2  
1-1-3  
1-1-2  
2-1-3  
3-1-3  
1-3-2  
3-3-2  
2-1-1  
2-3-3  
3-1-1  
1-3-3  
2-3-2  
1-1-1  
2-2-2  
1-2-2  
2-3-1  
3-3-3  
1-3-1  
3-2-2  
3-3-1  
2-2-3  
1-2-3  
3-2-3  
2-2-1  
1-2-1  
3-2-1

Probability

Novel Classes  
Known Classes

0.0 0.2 0.4 0.6 0.8 1.0
