# Supplementary material for: NoLogo: a new statistical model highlights the diversity and suggests new classes of Crm1-dependent nuclear export signals
Source: PubMed Central journal article supplement (PMC5828312; doi:10.1186/s12859-018-2076-7), 2018-02-27

# NESs

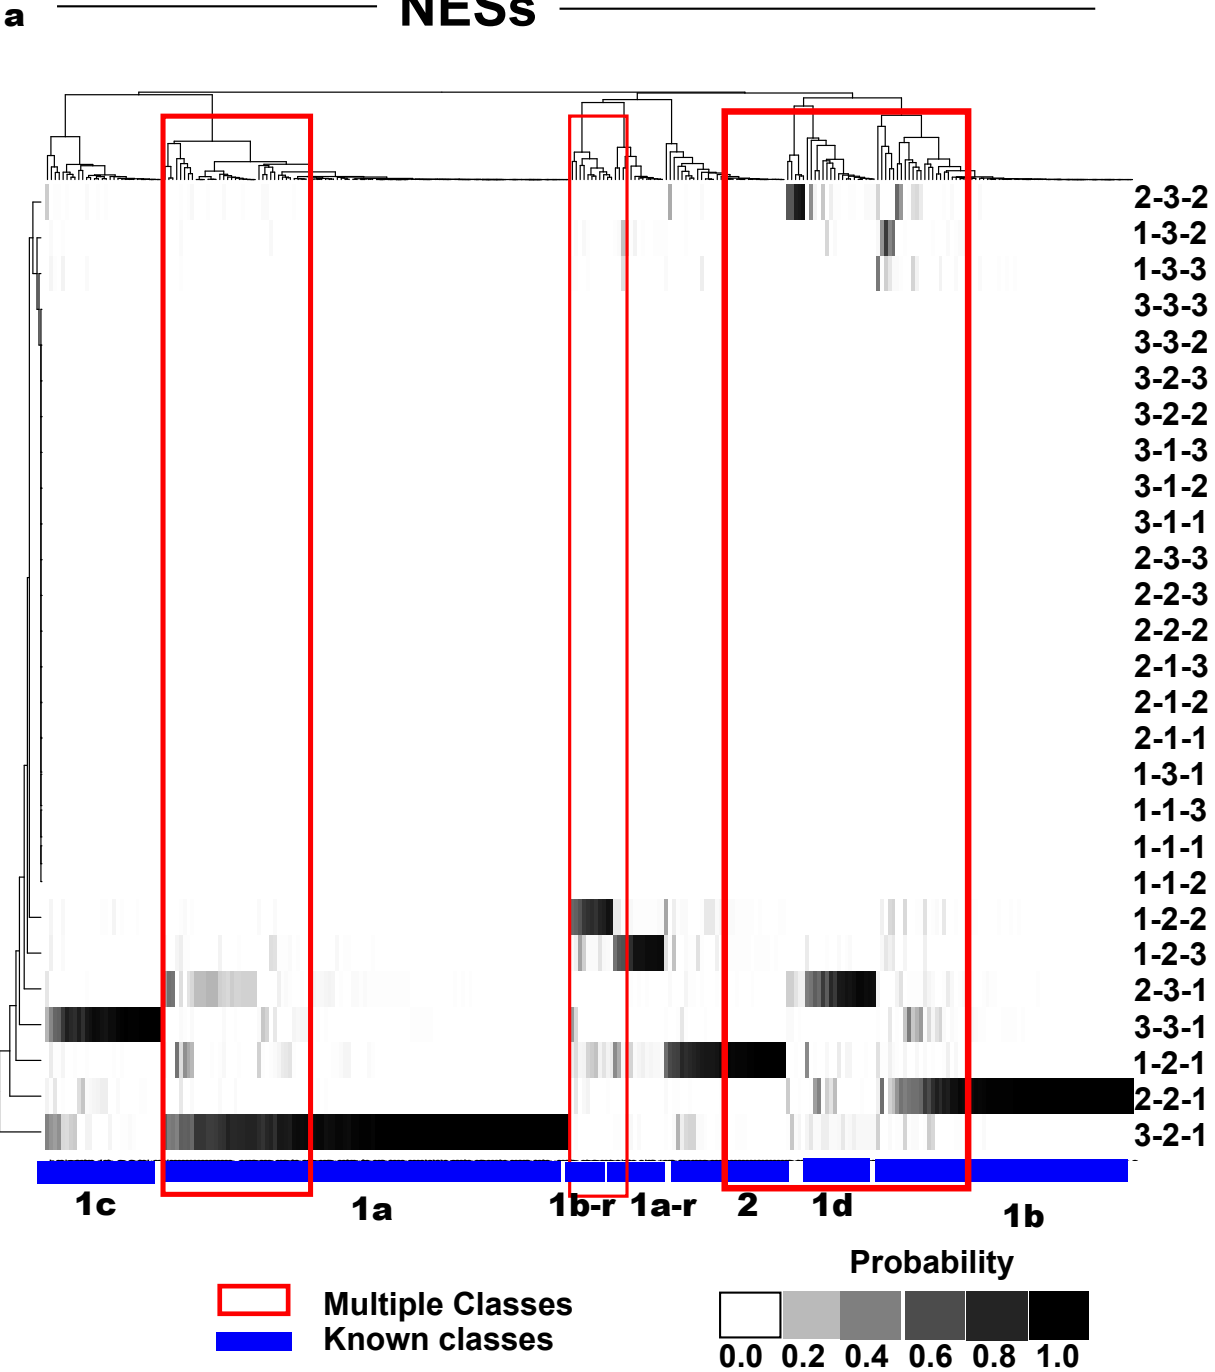

Multiple Classes  
 Known classes

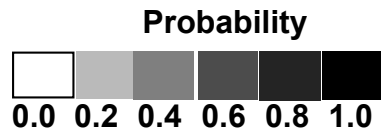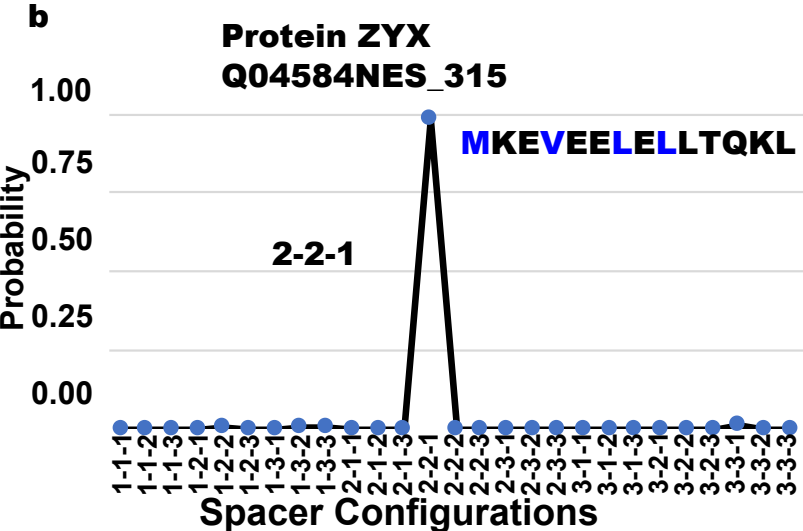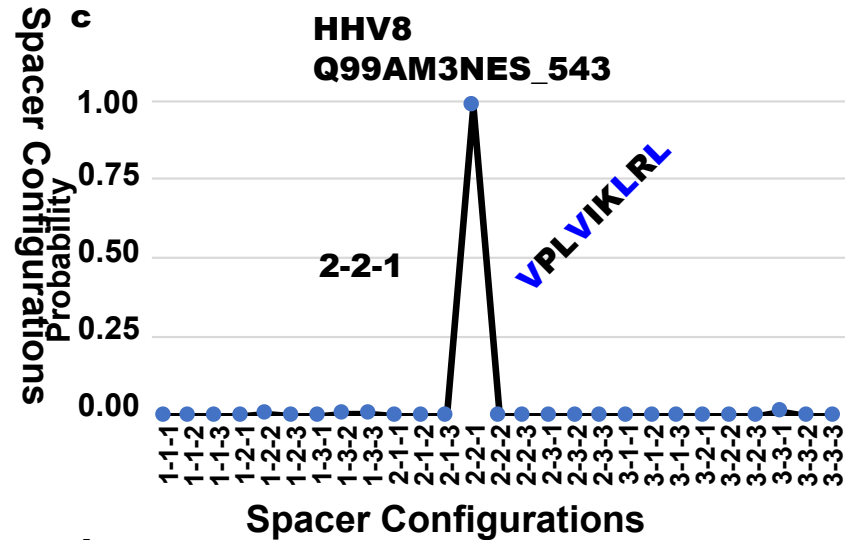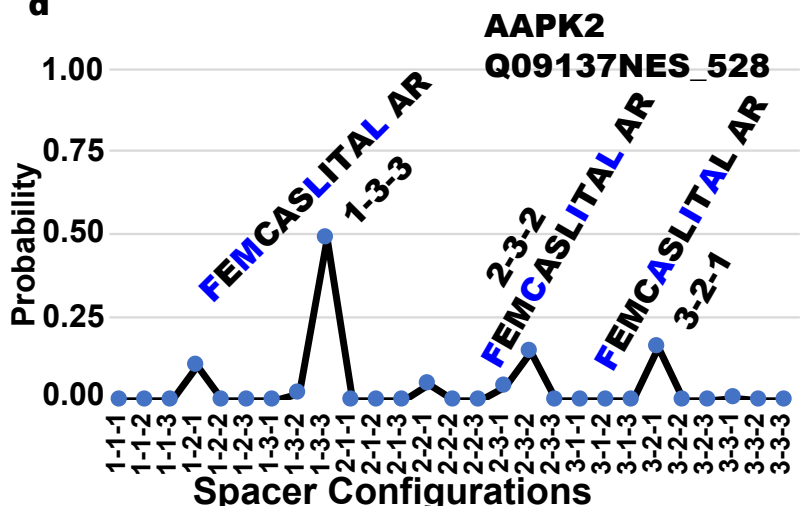

Supplement: 12859_2018_2076_MOESM10_ESM.pdf [file 12859_2018_2076_MOESM10_ESM.pdf]
